# Supplementary material for: Comparison of 81mKrypton and 99mTc-Technegas for ventilation single-photon emission computed tomography in severe chronic obstructive pulmonary disease
Source: PubMed Central journal article supplement — Nucl Med Commun. 2020 Oct 22;42(2):160–8. doi: 10.1097/MNM.0000000000001314 (PMC7808361; doi:10.1097/mnm.0000000000001314), 2020-10-22
Supplement: nmc-42-160-s001.pdf [file nmc-42-160-s001.pdf]

## Supplementary material

**Table 1. Averages and the corresponding SEMs for the penetration ratio, heterogeneity index and filtered heterogeneity index for MEGP ACSC data, separated for both lungs and time-points. Asterisks indicate the significant differences.**

| ±SEM                        | <sup>81m</sup> Krypton |           | Technegas  |           | <i>p</i> value difference |                      |
|-----------------------------|------------------------|-----------|------------|-----------|---------------------------|----------------------|
|                             | Right Lung             | Left Lung | Right lung | Left lung | Right Lung                | Left Lung            |
| <b>1 Month follow up</b>    |                        |           |            |           |                           |                      |
| Penetration Ratio           | 1.07±0.24              | 0.84±0.13 | 1.08±0.34  | 0.68±0.11 | 0.91                      | 0.04*                |
| Heterogeneity Index Overall | 0.93±0.07              | 1.07±0.08 | 0.99±0.09  | 1.17±0.16 | 0.23                      | 0.53                 |
| Heterogeneity Index 2-4 cm  | 0.37±0.03              | 0.37±0.03 | 0.46±0.05  | 0.56±0.10 | 0.08                      | 0.06                 |
| <b>3 month follow up</b>    |                        |           |            |           |                           |                      |
| Penetration Ratio           | 1.32±0.24              | 0.86±0.08 | 1.02±0.17  | 0.59±0.05 | 0.04*                     | 5·10 <sup>-4</sup> * |
| Heterogeneity Index Overall | 1.11±0.10              | 1.00±0.06 | 1.25±0.14  | 1.24±0.12 | 0.04*                     | 0.07                 |
| Heterogeneity Index 2-4 cm  | 0.41±0.04              | 0.36±0.03 | 0.57±0.07  | 0.59±0.07 | 0.002*                    | 0.002*               |

**Table 2. Averages and the corresponding SEMs for the penetration ratio, heterogeneity index and filtered heterogeneity index for LEGP ACSC data, separated for both lungs and time-points. Asterisks indicate the significant differences.**

| ±SEM                        | <sup>81m</sup> Krypton |           | Technegas  |           | <i>p</i> value difference |                      |
|-----------------------------|------------------------|-----------|------------|-----------|---------------------------|----------------------|
|                             | Right Lung             | Left Lung | Right lung | Left lung | Right Lung                | Left Lung            |
| <b>1 Month follow up</b>    |                        |           |            |           |                           |                      |
| Penetration Ratio           | 0.93±0.06              | 0.90±0.07 | 1.08±0.16  | 0.74±0.10 | 0.22                      | 0.006*               |
| Heterogeneity Index Overall | 0.69±0.06              | 0.69±0.05 | 1.22±0.16  | 1.21±0.13 | 9·10 <sup>-4</sup> *      | 0.02*                |
| Heterogeneity Index 2-4 cm  | 0.20±0.02              | 0.18±0.01 | 0.56±0.08  | 0.56±0.07 | 2·10 <sup>-4</sup> *      | 1·10 <sup>-4</sup> * |
| <b>3 month follow up</b>    |                        |           |            |           |                           |                      |
| Penetration Ratio           | 0.92±0.08              | 0.79±0.05 | 0.90±0.11  | 0.58±0.04 | 0.75                      | 7·10 <sup>-4</sup> * |
| Heterogeneity Index Overall | 0.75±0.05              | 0.71±0.05 | 1.27±0.14  | 1.26±0.13 | 3·10 <sup>-4</sup> *      | 0.002*               |
| Heterogeneity Index 2-4 cm  | 0.20±0.02              | 0.19±0.01 | 0.58±0.07  | 0.60±0.08 | 5·10 <sup>-5</sup> *      | 2·10 <sup>-4</sup> * |

**Table 3. Averages and the corresponding SEMs for the penetration ratio, heterogeneity index and filtered heterogeneity index for MEGP AC data, separated for both lungs and time-points. Asterisks indicate the significant differences.**

| ±SEM                        | <sup>81m</sup> Krypton |           | Technegas  |           | <i>p</i> value difference |                      |
|-----------------------------|------------------------|-----------|------------|-----------|---------------------------|----------------------|
|                             | Right Lung             | Left Lung | Right lung | Left lung | Right Lung                | Left Lung            |
| <b>1 Month follow up</b>    |                        |           |            |           |                           |                      |
| Penetration Ratio           | 1.11±0.24              | 0.88±0.13 | 1.14±0.35  | 0.73±0.12 | 0.79                      | 0.05                 |
| Heterogeneity Index Overall | 0.88±0.07              | 1.02±0.08 | 0.94±0.09  | 1.10±0.15 | 0.24                      | 0.58                 |
| Heterogeneity Index 2-4 cm  | 0.33±0.03              | 0.33±0.03 | 0.42±0.05  | 0.51±0.09 | 0.07                      | 0.06                 |
| <b>3 month follow up</b>    |                        |           |            |           |                           |                      |
| Penetration Ratio           | 1.34±0.23              | 0.88±0.08 | 1.08±0.17  | 0.63±0.05 | 0.04*                     | 6·10 <sup>-4</sup> * |
| Heterogeneity Index Overall | 1.06±0.10              | 0.95±0.06 | 1.18±0.13  | 1.16±0.11 | 0.04*                     | 0.08                 |
| Heterogeneity Index 2-4 cm  | 0.37±0.04              | 0.33±0.03 | 0.52±0.06  | 0.54±0.06 | 0.002*                    | 0.001*               |

**Table 4. Averages and the corresponding SEMs for the penetration ratio, heterogeneity index and filtered heterogeneity index for LEGP AC data, separated for both lungs and time-points. Asterisks indicate the significant differences.**

| ±SEM                        | <sup>81m</sup> Krypton |           | Technegas  |           | <i>p</i> value difference |                      |
|-----------------------------|------------------------|-----------|------------|-----------|---------------------------|----------------------|
|                             | Right Lung             | Left Lung | Right lung | Left lung | Right Lung                | Left Lung            |
| <b>1 Month follow up</b>    |                        |           |            |           |                           |                      |
| Penetration Ratio           | 0.99±0.06              | 0.95±0.07 | 1.14±0.16  | 0.79±0.10 | 0.23                      | 0.004*               |
| Heterogeneity Index Overall | 0.68±0.06              | 0.67±0.05 | 1.16±0.15  | 1.14±0.12 | 0.001*                    | 0.005*               |
| Heterogeneity Index 2-4 cm  | 0.18±0.02              | 0.17±0.01 | 0.51±0.07  | 0.52±0.07 | 2·10 <sup>-4</sup> *      | 1·10 <sup>-4</sup> * |
| <b>3 month follow up</b>    |                        |           |            |           |                           |                      |
| Penetration Ratio           | 0.98±0.08              | 0.83±0.05 | 0.96±0.11  | 0.61±0.04 | 0.68                      | 9·10 <sup>-4</sup> * |
| Heterogeneity Index Overall | 0.73±0.05              | 0.68±0.06 | 1.20±0.13  | 1.18±0.12 | 3·10 <sup>-4</sup> *      | 0.003*               |
| Heterogeneity Index 2-4 cm  | 0.19±0.02              | 0.17±0.02 | 0.54±0.06  | 0.55±0.07 | 5·10 <sup>-5</sup> *      | 3·10 <sup>-4</sup> * |

**Table 5. Averages and the corresponding SEMs for the penetration ratio, heterogeneity index and filtered heterogeneity index for MEGP NAC data, separated for both lungs and time-points. Asterisks indicate the significant differences.**

| ±SEM                        | <sup>81m</sup> Krypton |           | Technegas  |           | <i>p</i> value difference |                      |
|-----------------------------|------------------------|-----------|------------|-----------|---------------------------|----------------------|
|                             | Right Lung             | Left Lung | Right lung | Left lung | Right Lung                | Left Lung            |
| <b>1 Month follow up</b>    |                        |           |            |           |                           |                      |
| Penetration Ratio           | 0.80±0.13              | 0.74±0.11 | 0.77±0.17  | 0.59±0.09 | 0.58                      | 0.02*                |
| Heterogeneity Index Overall | 0.92±0.07              | 1.07±0.07 | 0.94±0.08  | 1.09±0.16 | 0.73                      | 0.93                 |
| Heterogeneity Index 2-4 cm  | 0.35±0.03              | 0.37±0.03 | 0.42±0.05  | 0.51±0.09 | 0.14                      | 0.12                 |
| <b>3 month follow up</b>    |                        |           |            |           |                           |                      |
| Penetration Ratio           | 0.99±0.16              | 0.75±0.06 | 0.77±0.10  | 0.53±0.04 | 0.03*                     | 3·10 <sup>-4</sup> * |
| Heterogeneity Index Overall | 1.08±0.09              | 1.00±0.06 | 1.12±0.12  | 1.14±0.11 | 0.39                      | 0.24                 |
| Heterogeneity Index 2-4 cm  | 0.39±0.04              | 0.35±0.03 | 0.50±0.06  | 0.53±0.06 | 0.004*                    | 0.005*               |

**Table 6. Averages and the corresponding SEMs for the penetration ratio, heterogeneity index and filtered heterogeneity index for LEGP NAC data, separated for both lungs and time-points. Asterisks indicate the significant differences.**

| ±SEM                        | <sup>81m</sup> Krypton |           | Technegas  |           | <i>p</i> value difference |                      |
|-----------------------------|------------------------|-----------|------------|-----------|---------------------------|----------------------|
|                             | Right Lung             | Left Lung | Right lung | Left lung | Right Lung                | Left Lung            |
| <b>1 Month follow up</b>    |                        |           |            |           |                           |                      |
| Penetration Ratio           | 0.74±0.05              | 0.76±0.06 | 0.84±0.10  | 0.64±0.09 | 0.19                      | 0.01*                |
| Heterogeneity Index Overall | 0.66±0.04              | 0.67±0.03 | 1.11±0.13  | 1.09±0.11 | 0.001*                    | 0.008*               |
| Heterogeneity Index 2-4 cm  | 0.19±0.01              | 0.18±0.01 | 0.49±0.06  | 0.49±0.06 | 2·10 <sup>-4</sup> *      | 2·10 <sup>-4</sup> * |
| <b>3 month follow up</b>    |                        |           |            |           |                           |                      |
| Penetration Ratio           | 0.72±0.05              | 0.68±0.04 | 0.70±0.08  | 0.52±0.04 | 0.63                      | 2·10 <sup>-4</sup> * |
| Heterogeneity Index Overall | 0.71±0.04              | 0.69±0.04 | 1.13±0.12  | 1.14±0.12 | 8·10 <sup>-4</sup> *      | 0.005*               |
| Heterogeneity Index 2-4 cm  | 0.20±0.02              | 0.19±0.01 | 0.50±0.06  | 0.52±0.06 | 7·10 <sup>-5</sup> *      | 2·10 <sup>-4</sup> * |
